# Supplementary material
Source: PubMed Central journal article supplement (PMC7259516)
Supplement: jciinsight-5-137260-s015.pdf [file jciinsight-5-137260-s015.pdf]

# Supplementary Figure 1

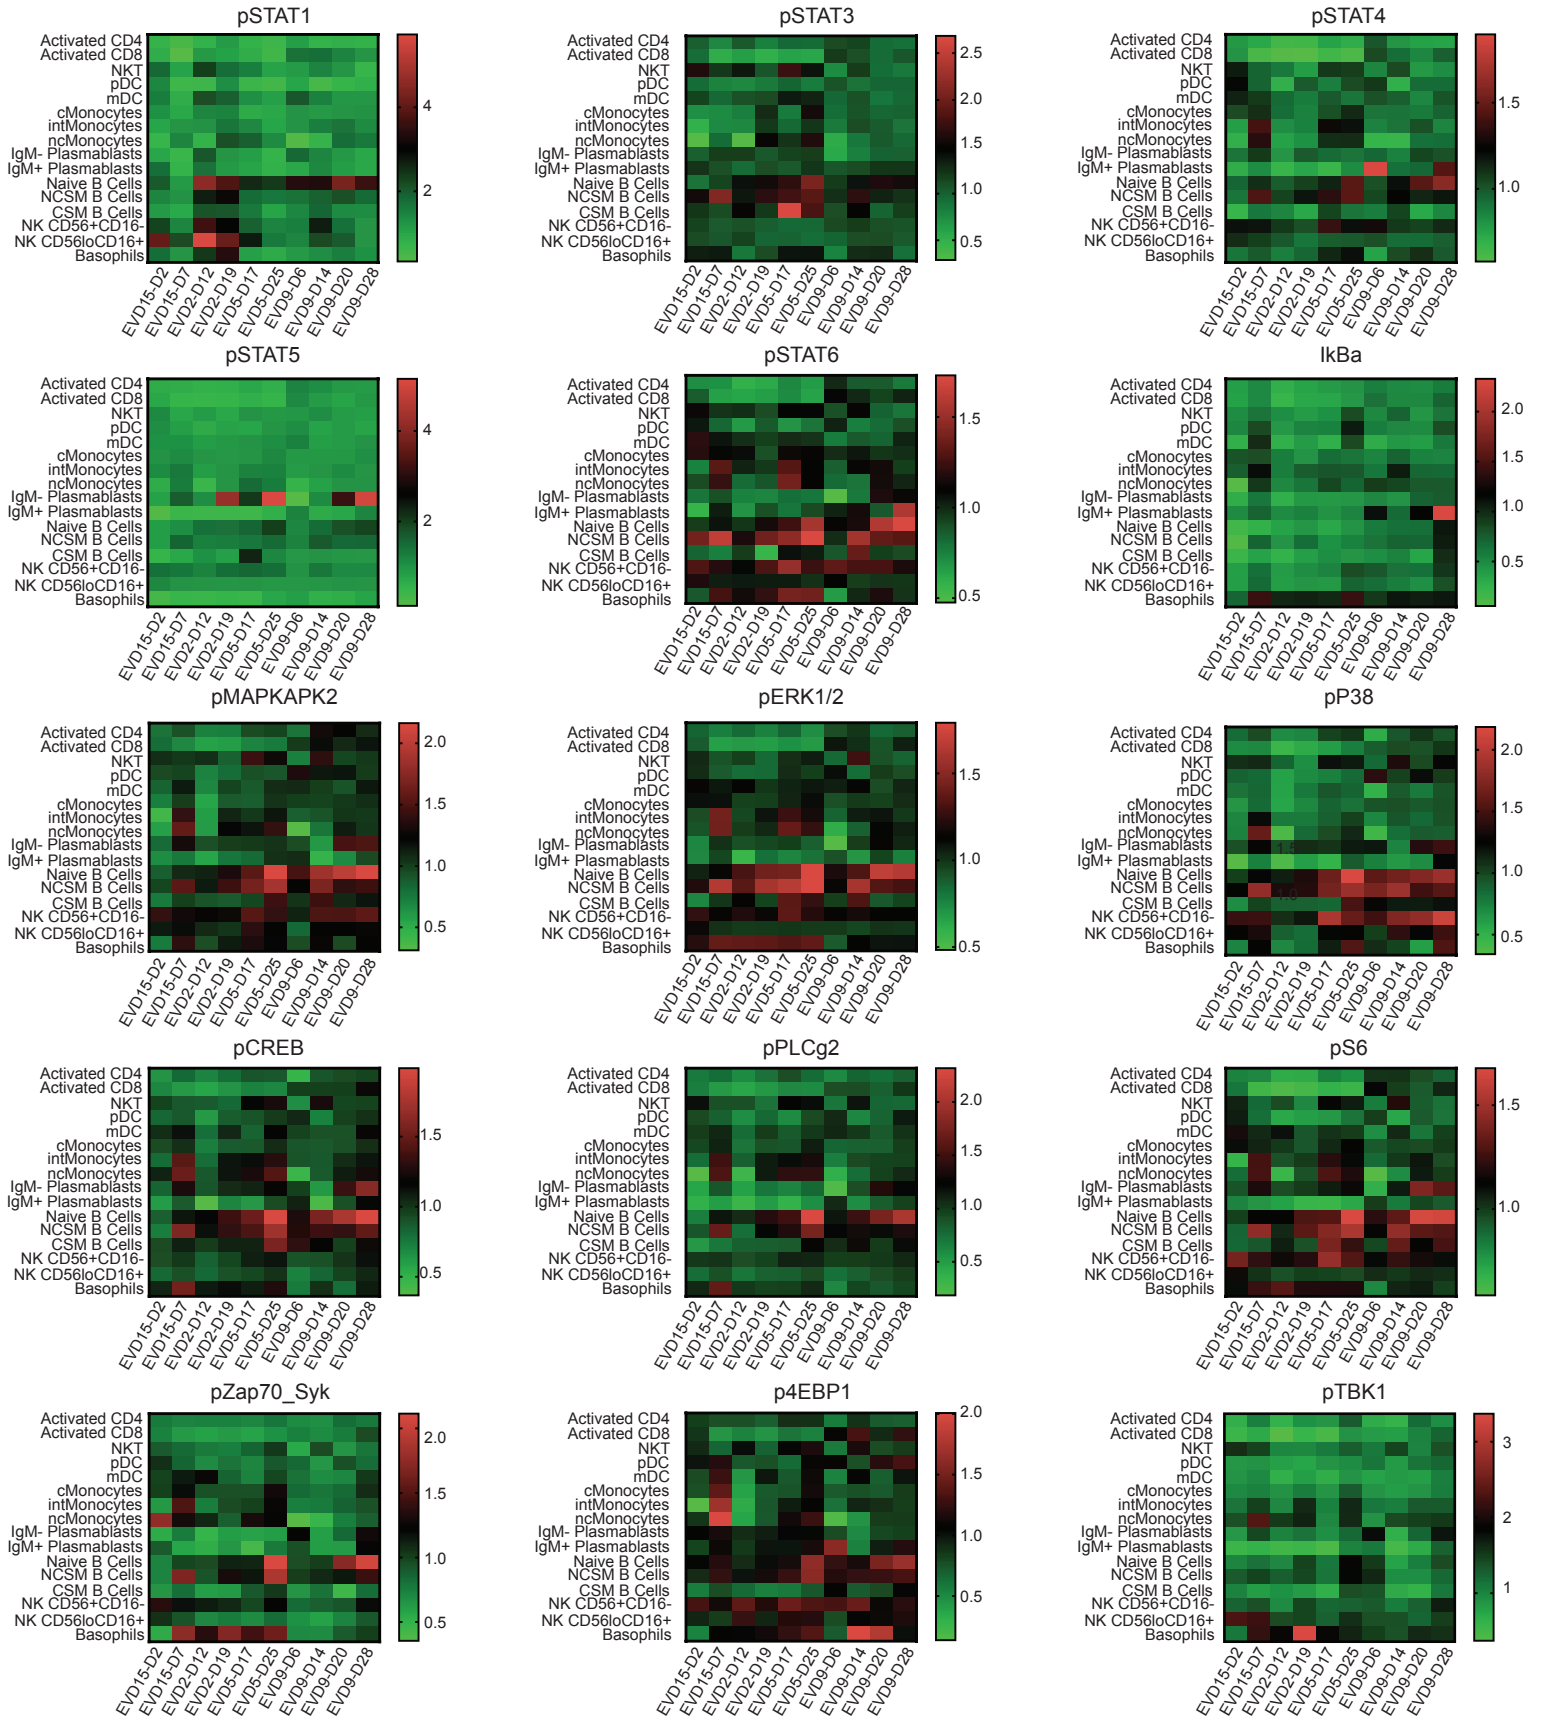

Supplementary Figure 1: Heat maps showing the various phosphorylated intracellular signaling markers for the measured cell types. The median signal intensity for each phosphorylated marker at each timepoint was compared to the median of that phosphorylated marker on that cell type for simultaneously acquired control samples.

Supplementary Table 1: Antibodies used in this study

| REAGENT or RESOURCE                                  | SOURCE                    | IDENTIFIER                               |
|------------------------------------------------------|---------------------------|------------------------------------------|
| Antibodies                                           |                           |                                          |
| Mouse monoclonal anti-CD38 (Clone HIT2)              | Biolegend                 | Cat#:303502; RRID: AB_314354             |
| Mouse monoclonal anti-CD235a (Clone HIR2)            | Biolegend                 | Cat#:306602; RRID: AB_314620             |
| Mouse monoclonal anti-CD45 (Cline HI30)              | Biolegend                 | Cat#:304002; RRID: AB_314390             |
| Mouse monoclonal anti-STAT3 pY705 (Clone 4)          | BD                        | Cat#:612357; RRID: 399646                |
| Mouse monoclonal anti-CD61 (Clone VI-PL2)            | Biolegend                 | Cat#:336402; RRID: AB_1227584            |
| Mouse monoclonal anti-CD7 (Clone M-T701)             | BD                        | Cat#:555359; RRID: AB_395762             |
| Mouse monoclonal anti-CD33 (Clone AC104.3E3)         | Miltenyi                  | Custom Order (Purified); RRID: 615078    |
| Mouse monoclonal anti-CD11c (Clone Bu15)             | Biolegend                 | Cat#:337202; RRID: AB_1236381            |
| Rabbit monoclonal anti-MAPKAPK2 pT334 (Clone 27B7)   | Cell Signaling Technology | Cat#:3007S; RRID: AB_490936              |
| Rabbit monoclonal anti-CREB pS133 (Clone 87G3)       | Cell Signaling Technology | Cat#:9198S; RRID: AB_2561044             |
| Mouse monoclonal anti-PCLy2 pY759 (Clone K86-689.37) | BD                        | Custom Order (Purified); RRID: AB_647226 |
| Mouse monoclonal anti-STAT1 pY701 (Clone 4a)         | BD                        | Cat#:612232; RRID: AB_399555             |
| Mouse monoclonal anti-CD123 (Clone 7G3)              | BD                        | Cat#:554527; RRID: AB_395455             |
| Mouse monoclonal anti-STAT5 pY694 (Clone 47)         | BD                        | Cat#:611965; RRID: AB_399386             |
| Rabbit monoclonal anti-S6 p235/236 (Clone 2F9)       | Cell Signaling Technology | Cat#:4858S; RRID: AB_916156              |

Supplementary Table 1: Antibodies used in this study

|                                                            |                           |                                   |
|------------------------------------------------------------|---------------------------|-----------------------------------|
| Mouse monoclonal anti-CD14 (Clone M5E2)                    | Biolegend                 | Cat#:301802; RRID: AB_314184      |
| Rabbit monoclonal anti-Erk1/2 pT202/Y204 (Clone D13.14.4E) | Cell Signaling Technology | Cat#:4370S; RRID: AB_2315112      |
| Mouse monoclonal anti-CD11b (Clone ICRF44)                 | Biolegend                 | Cat#:301302; RRID: AB_314154      |
| Mouse monoclonal anti-P38 pT180/Y182 (Clone36/p38)         | BD                        | Cat#:612289; RRID: AB_399606      |
| Mouse monoclonal anti-CD8a (Clone RPA-T8)                  | Biolegend                 | Cat#:301002; RRID: AB_314120      |
| Mouse monoclonal anti-CD4 (Clone OKT4)                     | Biolegend                 | Cat#:317402; RRID: AB_571963      |
| Mouse monoclonal anti-CD3 (Clone SP34.2)                   | BD                        | Cat#:551916; RRID: AB_394293      |
| Rat monoclonal anti-CD66 (Clone YTH71.3)                   | Pierce                    | Cat#:MA1-36189; RRID: AB_1073288  |
| Mouse monoclonal anti-CD16 (Clone 3G8)                     | Biolegend                 | Cat#:302033; RRID: AB_2104002     |
| Mouse monoclonal anti-Zap70/Syk pY319/Y352 (Clone 17a)     | BD                        | Cat#:612575; RRID: AB_399864      |
| Rabbit monoclonal anti-TBK1/NAP pS172 (Clone D52C2)        | Cell Signaling Technology | Cat#:5483S; RRID: AB_10693472     |
| Mouse monoclonal anti-CD1c (Clone AD5-8E7)                 | Miltenyi                  | Cat#:130-090-695; RRID: AB_244309 |
| Mouse monoclonal anti-IkBa amino-terminal (Clone L35A5)    | Cell Signaling Technology | Cat#:4814S; RRID: AB_390781       |
| Mouse monoclonal anti-BDCA3 (Clone 1A4)                    | BD                        | Cat#:559780; RRD: AB_394321       |
| Mouse monoclonal anti-STAT6 pY641 (Clone 18)               | BD                        | Cat#:611567; RRID: AB_399013      |
| Mouse monoclonal anti-CD45RA (Clone HI100)                 | Biolegend                 | Cat#:304102; RRID: AB_314406      |
| Rat monoclonal anti-FoxP3 (Clone PCH101)                   | Thermo Fisher Scientific  | Cat#:14-4776-82; RRID: AB_467554  |

Supplementary Table 1: Antibodies used in this study

|                                                     |                           |                                   |
|-----------------------------------------------------|---------------------------|-----------------------------------|
| Mouse monoclonal anti-CD161 (Clone HP-G310)         | Biolegend                 | Cat#:339902; RRID: AB_1501090     |
| Rat monoclonal anti-Ki67 (Clone SolA15)             | Thermo Fisher Scientific  | Cat#:17-5698-82; RRID: AB_2688057 |
| Mouse monoclonal anti-STAT4 pY693 (Clone 38)        | BD                        | Cat#:612738; RRID: AB_399957      |
| Mouse monoclonal anti-CCR7 (Clone 150503)           | R&D Biosystems            | Cat#:MAB197; RRID: AB_2072803     |
| Rabbit monoclonal anti-4E-BP1 pT37/46 (Clone 236B4) | Cell Signaling Technology | Cat#:2855S; RRID: AB_560853       |
| Mouse monoclonal anti-CD19 (Clone J3-119)           | Beckman Coulter           | Cat#:IM1313; RRID: AB_131613      |
| Mouse monoclonal anti-IgM (Clone G20-127)           | BD                        | Cat#:555780; RRID: AB_396115      |
| Mouse monoclonal anti-CD56 (Clone NCAM16.2)         | BD                        | Cat#:559043; RRID: AB_397180      |
| Mouse monoclonal anti-HLA-DR (Clone Immu357)        | Beckman Coulter           | Cat#:Immu357; RRID: AB_131284     |
| Mouse monoclonal anti-CD27 (Clone O323)             | Biolegend                 | Cat#:302802; RRID: AB_314294      |
